# Supplementary material for: Local differential privacy protection for wearable device data
Source: PubMed Central journal article supplement (PMC9385068; doi:10.1371/journal.pone.0272766), 2022-08-17
Supplement: pone.0272766.s001.pdf [file pone.0272766.s001.pdf]

**S1 Table. Dataset summary.**

| Dataset number      | 101    | 102    | 103   | 104    | 105    | 106    | 107   | 108    |
|---------------------|--------|--------|-------|--------|--------|--------|-------|--------|
| Number of instances | 600    | 600    | 600   | 600    | 600    | 600    | 600   | 600    |
| Value range         | 78~120 | 74~107 | 68~94 | 57~121 | 70~101 | 60~104 | 60~99 | 66~104 |
