# Supplementary material for: Local differential privacy protection for wearable device data
Source: PubMed Central journal article supplement (PMC9385068; doi:10.1371/journal.pone.0272766), 2022-08-17
Supplement: pone.0272766.s002.pdf [file pone.0272766.s002.pdf]

**S2 Table. Errors under different privacy budgets.**

| Privacy budget | MRE           |               |               | RMSE           |               |               |
|----------------|---------------|---------------|---------------|----------------|---------------|---------------|
|                | 0.5           | 1             | 2             | 0.5            | 1             | 2             |
| Linear         | <b>0.1292</b> | <b>0.0662</b> | <b>0.0383</b> | <b>13.2004</b> | <b>6.7997</b> | <b>4.5037</b> |
| Pchip          | 0.1383        | 0.0717        | 0.0416        | 14.4537        | 7.3646        | 4.8847        |
| Spline         | 0.1635        | 0.0799        | 0.0466        | 18.0156        | 8.1994        | 5.3600        |
