# Supplementary material for: Local differential privacy protection for wearable device data
Source: PubMed Central journal article supplement (PMC9385068; doi:10.1371/journal.pone.0272766), 2022-08-17
Supplement: pone.0272766.s003.pdf [file pone.0272766.s003.pdf]

**S3 Table. Errors under different data sizes.**

| Data Size | MRE           |              |               |               |               | RMSE          |               |               |               |               |
|-----------|---------------|--------------|---------------|---------------|---------------|---------------|---------------|---------------|---------------|---------------|
|           | 120K          | 240K         | 360K          | 480K          | 600K          | 120K          | 240K          | 360K          | 480K          | 600K          |
| Linear    | <b>0.0863</b> | <b>0.061</b> | <b>0.0537</b> | <b>0.0434</b> | <b>0.0383</b> | <b>9.6957</b> | <b>6.8377</b> | <b>5.5881</b> | <b>4.9978</b> | <b>4.5037</b> |
| Pchip     | 0.0936        | 0.065        | 0.0575        | 0.0459        | 0.0416        | 10.3896       | 7.2703        | 5.964         | 5.3067        | 4.8847        |
| Spline    | 0.1033        | 0.0718       | 0.0621        | 0.0511        | 0.0466        | 11.2769       | 8.0054        | 6.5701        | 5.8302        | 5.3600        |
